# Supplementary material
Source: publisher figshare collection journal article supplement (https://sage.figshare.com/ndownloader/files/23063288)
Supplement: Supplementary file 1 [file 23063288]

eds_g8	n	orig_year	orig_math_state	dest_math_state	mn_female
0	2385	2009	Grade	Alg I	0.426
0	115376	2009	Grade	Grade	0.493
1	631	2009	Grade	Alg I	0.475
1	134923	2009	Grade	Grade	0.500
0	3810	2009		Grade	0.491
1	3519	2009		Grade	0.495
0	73931	2010	Grade	Grade	0.484
0	45255	2010	Grade	Alg I	0.507
1	111225	2010	Grade	Grade	0.493
1	27217	2010	Grade	Alg I	0.528
0	2461	2010	Alg I	Geom	0.425
1	636	2010	Alg I	Geom	0.475
0	13791	2010		Grade	0.478
0	4459	2010		Alg I	0.508
1	27494	2010		Grade	0.492
1	3101	2010		Alg I	0.531
0	569	2011	Grade	Geom	0.483
0	834	2011	Grade	Math Models	0.471
0	85135	2011	Grade	Alg I	0.484
0	369	2011	Grade	Ind. Study	0.491
0	433	2011	Grade	Grade	0.358
0	325	2011	Grade	No Mathematics	0.406
1	1740	2011	Grade	Grade	0.393
1	3928	2011	Grade	Math Models	0.493
1	732	2011	Grade	No Mathematics	0.460
1	1190	2011	Grade	Geom	0.479
1	129674	2011	Grade	Alg I	0.495
1	1379	2011	Grade	Ind. Study	0.468
0	1161	2011	Alg I	Alg II	0.482
0	46401	2011	Alg I	Geom	0.510
0	1953	2011	Alg I	Alg I	0.475
1	2485	2011	Alg I	Alg I	0.481
1	26909	2011	Alg I	Geom	0.534
1	653	2011	Alg I	Alg II	0.498
0	2573	2011	Geom	Alg II	0.425
1	657	2011	Geom	Alg II	0.476
1	306	2012	No Mathematics	Geom	0.490
0	359	2012	Grade	Alg I	0.343
1	1387	2012	Grade	Alg I	0.386
0	76719	2012	Alg I	Geom	0.487
0	1691	2012	Alg I	Alg I	0.345
0	4169	2012	Alg I	Alg II	0.515
0	830	2012	Alg I	Math Models	0.410
0	484	2012	Alg I	Drop-out	0.413
0	3102	2012	Alg I	No Mathematics	0.482
1	2233	2012	Alg I	Drop-out	0.458
1	4852	2012	Alg I	Alg I	0.372
1	2412	2012	Alg I	Math Models	0.449
1	5883	2012	Alg I	Alg II	0.516
1	5778	2012	Alg I	No Mathematics	0.479
1	110620	2012	Alg I	Geom	0.501
1	381	2012	Alg I	Ind. Study	0.538
0	664	2012	Math Models	Geom	0.459
1	3200	2012	Math Models	Geom	0.501
0	44822	2012	Geom	Alg II	0.510
0	319	2012	Geom	Pre-Calc	0.508
0	327	2012	Geom	Geom	0.401
0	391	2012	Geom	Math Models	0.522
0	891	2012	Geom	No Mathematics	0.519
1	25664	2012	Geom	Alg II	0.534
1	803	2012	Geom	Geom	0.458
1	445	2012	Geom	Math Models	0.537
1	497	2012	Geom	No Mathematics	0.551
1	318	2012	Geom	Pre-Calc	0.575
0	2523	2012	Alg II	Pre-Calc	0.428
0	690	2012	Alg II	Geom	0.519
1	429	2012	Alg II	Geom	0.513
1	780	2012	Alg II	Pre-Calc	0.477
0	323	2012	Ind. Study	Geom	0.498
1	1130	2012	Ind. Study	Geom	0.478
1	489	2013	No Mathematics	No Mathematics	0.474
0	1295	2013	Alg I	Geom	0.329
0	381	2013	Alg I	No Mathematics	0.365
1	3398	2013	Alg I	Geom	0.388
1	700	2013	Alg I	Drop-out	0.343
1	486	2013	Alg I	Alg II	0.449
1	1325	2013	Alg I	No Mathematics	0.398
1	335	2013	Alg I	Math Models	0.322
1	509	2013	Alg I	Alg I	0.285
0	641	2013	Math Models	Geom	0.417
0	405	2013	Math Models	Alg II	0.528
1	1645	2013	Math Models	Geom	0.450
1	605	2013	Math Models	Alg II	0.524
1	417	2013	Math Models	No Mathematics	0.470
0	680	2013	Geom	Drop-out	0.406
0	2769	2013	Geom	Geom	0.359
0	1006	2013	Geom	Pre-Calc	0.539
0	3574	2013	Geom	No Mathematics	0.482
0	60766	2013	Geom	Alg II	0.503
0	9660	2013	Geom	Math Models	0.421
1	6752	2013	Geom	No Mathematics	0.500
1	1309	2013	Geom	Pre-Calc	0.565
1	7111	2013	Geom	Geom	0.406
1	533	2013	Geom	Alg I	0.358
1	82627	2013	Geom	Alg II	0.520
1	543	2013	Geom	Ind. Study	0.580
1	14824	2013	Geom	Math Models	0.450
1	2658	2013	Geom	Drop-out	0.423
0	1940	2013	Alg II	AP Stats	0.493
0	1657	2013	Alg II	No Mathematics	0.506
0	1990	2013	Alg II	Geom	0.484
0	577	2013	Alg II	Alg II	0.414
0	2070	2013	Alg II	Ind. Study	0.561
0	874	2013	Alg II	Other Mathematics	0.494
0	39758	2013	Alg II	Pre-Calc	0.513
1	639	2013	Alg II	AP Stats	0.531
1	3666	2013	Alg II	Geom	0.516
1	1101	2013	Alg II	Ind. Study	0.582
1	1040	2013	Alg II	Alg II	0.437
1	22902	2013	Alg II	Pre-Calc	0.536
1	1271	2013	Alg II	No Mathematics	0.545
1	653	2013	Alg II	Other Mathematics	0.505
0	1452	2013	Pre-Calc	AP Calc AB	0.459
0	609	2013	Pre-Calc	AP Calc BC	0.319
1	629	2013	Pre-Calc	AP Calc AB	0.512
1	373	2013		Alg II	0.525
0	998	2014	No Mathematics	No Mathematics	0.463
1	354	2014	No Mathematics	Alg II	0.508
1	1626	2014	No Mathematics	No Mathematics	0.494
0	429	2014	Other Mathematics	No Mathematics	0.501
1	350	2014	Other Mathematics	No Mathematics	0.523
1	516	2014	Alg I	No Mathematics	0.314
0	2254	2014	Math Models	No Mathematics	0.374
0	6789	2014	Math Models	Alg II	0.447
0	303	2014	Math Models	Math Models	0.290
1	733	2014	Math Models	Drop-out	0.337
1	728	2014	Math Models	Geom	0.354
1	9782	2014	Math Models	Alg II	0.479
1	3574	2014	Math Models	No Mathematics	0.419
1	554	2014	Math Models	Math Models	0.357
0	678	2014	Geom	Math Models	0.323
0	318	2014	Geom	Other Mathematics	0.462
0	2088	2014	Geom	Alg II	0.412
0	329	2014	Geom	Drop-out	0.277
0	438	2014	Geom	Ind. Study	0.514
0	555	2014	Geom	Geom	0.292
0	1545	2014	Geom	No Mathematics	0.370
0	901	2014	Geom	Pre-Calc	0.494
1	1513	2014	Geom	Math Models	0.365
1	1898	2014	Geom	Pre-Calc	0.524
1	1219	2014	Geom	Drop-out	0.369
1	1611	2014	Geom	Geom	0.342
1	392	2014	Geom	Ind. Study	0.523
1	613	2014	Geom	Other Mathematics	0.546
1	3676	2014	Geom	No Mathematics	0.437
1	5382	2014	Geom	Alg II	0.446
0	7570	2014	Alg II	No Mathematics	0.467
0	29846	2014	Alg II	Pre-Calc	0.515
0	1727	2014	Alg II	AP Stats	0.581
0	368	2014	Alg II	Geom	0.391
0	447	2014	Alg II	Drop-out	0.389
0	666	2014	Alg II	Math Models	0.395
0	11441	2014	Alg II	Ind. Study	0.530
0	2137	2014	Alg II	Alg II	0.397
0	7896	2014	Alg II	Other Mathematics	0.482
1	1213	2014	Alg II	Math Models	0.412
1	1234	2014	Alg II	AP Stats	0.616
1	10183	2014	Alg II	Other Mathematics	0.509
1	13522	2014	Alg II	No Mathematics	0.513
1	1697	2014	Alg II	Drop-out	0.401
1	11632	2014	Alg II	Ind. Study	0.539
1	39227	2014	Alg II	Pre-Calc	0.538
1	1200	2014	Alg II	Geom	0.390
1	5118	2014	Alg II	Alg II	0.431
0	1132	2014	Ind. Study	No Mathematics	0.575
0	318	2014	Ind. Study	Ind. Study	0.610
0	610	2014	Ind. Study	Pre-Calc	0.500
1	408	2014	Ind. Study	Pre-Calc	0.549
1	793	2014	Ind. Study	No Mathematics	0.619
0	1516	2014	Pre-Calc	Other Mathematics	0.516
0	4782	2014	Pre-Calc	Ind. Study	0.547
0	10161	2014	Pre-Calc	No Mathematics	0.551
0	5905	2014	Pre-Calc	AP Stats	0.576
0	699	2014	Pre-Calc	Pre-Calc	0.474
0	3661	2014	Pre-Calc	AP Calc BC	0.404
0	14255	2014	Pre-Calc	AP Calc AB	0.478
1	1083	2014	Pre-Calc	Pre-Calc	0.454
1	8526	2014	Pre-Calc	No Mathematics	0.565
1	1203	2014	Pre-Calc	Other Mathematics	0.512
1	2457	2014	Pre-Calc	AP Stats	0.602
1	7630	2014	Pre-Calc	AP Calc AB	0.508
1	2222	2014	Pre-Calc	Ind. Study	0.577
1	863	2014	Pre-Calc	AP Calc BC	0.446
0	872	2014	AP Stats	AP Calc AB	0.484
0	614	2014	AP Stats	AP Calc BC	0.420
0	480	2014	AP Stats	No Mathematics	0.512
0	311	2014	AP Calc AB	No Mathematics	0.486
0	419	2014	AP Calc AB	AP Stats	0.530
0	878	2014	AP Calc AB	AP Calc BC	0.409
1	396	2014	AP Calc AB	AP Calc BC	0.480
0	366	2014	AP Calc BC	AP Stats	0.339
1	368	2014		Drop-out	0.432
